# Supplementary material for: Quality Improvement Interventions for Nutritional Assessment among Pregnant Mothers in Northeastern Uganda
Source: Biomed Res Int. 2017 May 30;2017:8036535. doi: 10.1155/2017/8036535 (PMC5468564; doi:10.1155/2017/8036535)
Supplement: Supplementary file 1 — Table showing pregnant mothers assessed for nutritional status at Kaabong Hospital ANC Clinic. [file 8036535.f1.pdf]

Supplementary material S1: Pregnant mothers eligible for nutritional assessment at ANC clinic, Kaabong Hospital

[illegible]
